# Supplementary material for: Transgenic IGF-IR overexpression induces mammary tumors with basal-like characteristics, whereas IGF-IR-independent mammary tumors express a claudin-low gene signature
Source: PubMed Central journal article supplement — Oncogene. 2011 Oct 24;31(27):3298–309. doi: 10.1038/onc.2011.486 (PMC3391665; doi:10.1038/onc.2011.486), 2011-10-24
Supplement: onc2011486x1.pdf [file onc2011486x1.pdf]

**Supplementary Table 1: Mouse and Tumor Characteristics**

| Tissue | Initial Tumor onset (days) <sup>1</sup> | Tumor Regression (days) <sup>2</sup> | Tumor Recurrence (days) <sup>3</sup> | Age at Tissue Collection (days) |
|--------|-----------------------------------------|--------------------------------------|--------------------------------------|---------------------------------|
| WT     | N/A                                     | N/A                                  | N/A                                  | 119 ± 10                        |
| PMT    | 45 ± 7.5                                | N/A                                  | N/A                                  | 121 ± 24                        |
| RST    | 47 ± 8.6                                | 35 ± 11                              | 116 ± 110                            | 265 ± 107                       |

<sup>1</sup>IGF-IR expression was induced in all mice at 21 days age and tumor onset indicates the number of days required for a mammary tumor to become palpable following IGF-IR induction.

<sup>2</sup>number of days required for tumors to regress to a non-palpable state. The tumors in 2 of the 8 mice failed to completely regress and were not included in this value.

<sup>3</sup>number of days required for tumors to become palpable after regressing to a non-palpable state. The tumors in 2 of the 8 mice failed to completely regress and were not included in this value.

<sup>4</sup>Values represent mean ± SEM; N/A = not applicable
